# Supplementary material for: Artificial light at night reshapes vertical distributions of lake zooplankton across population and community scales
Source: Research Square preprint supplement (doi:10.21203/rs.3.rs-8666965/v1), 2026-02-04
Supplement: Supplementary file 1 [file b33d691a389654f0762474b2.docx]

**Supplementary Information**

**Artificial light at night reshapes vertical distributions of lake zooplankton across population and community scales**

**Katarzyna Maja Rutkowska1, Ewa Babkiewicz1,2, Piotr Maszczyk1,*, Mirosław Ślusarczyk1, Marcin Lukasz Zebrowski1*,* Joanna Tałanda1,3**

*1 Department of Hydrobiology, Institute of Ecology, Faculty of Biology, University of Warsaw, Warsaw, Poland*

*2 Biological and Chemical Research Centre, University of Warsaw, Warsaw, Poland*

*3Department of Animal Physiology, Institute of Experimental Zoology, Faculty of Biology, University of Warsaw, Warsaw, Poland*

_______________________________________

* Corresponding author: Piotr Maszczyk, e-mail p.maszczyk@uw.edu.pl


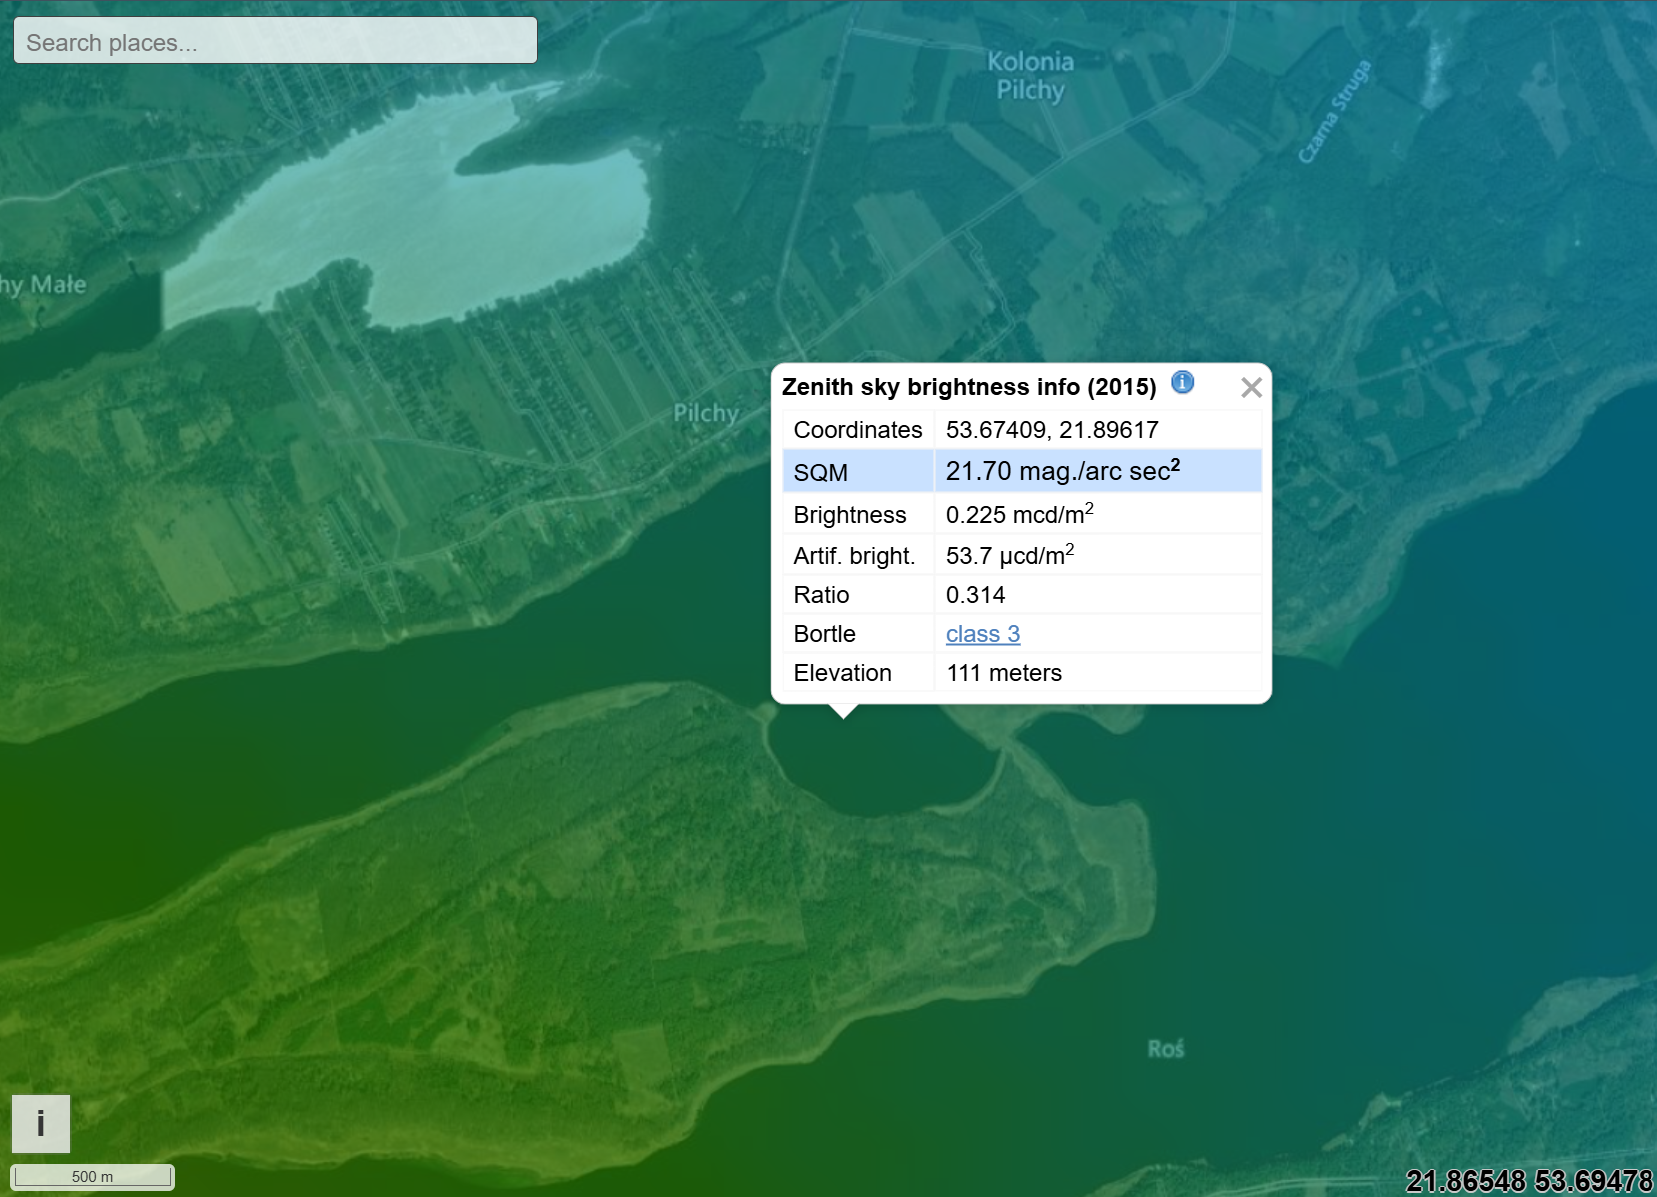


**Fig. S1. Sky brightness at the study site** Zenith sky brightness in the vicinity of Lake Roś (Pilchy, northeastern Poland), derived from the Light Pollution Map (2015). The marked location (53.67409°N, 21.89617°E) corresponds to the experimental bay and indicates a sky quality of 21.70 mag arcsec⁻², characteristic of Bortle class 3 (rural sky). Modeled artificial skyglow at the site was 53.7 μcd m⁻² under clear-sky conditions. The background colour scale illustrates spatial variation in artificial sky brightness across the surrounding region.

**Table S1.** Photosynthetically active radiation (PAR) measured during both experimental campaigns using a Li-Cor LI-189™ quantum sensor at discrete depths (0–7 m). Values are reported as irradiance (µmol m⁻² s⁻¹). For reference, illuminance (lx) can be approximated using source-specific conversion factors (sunlight ≈ 54 lx per µmol m⁻² s⁻¹; HPS ≈ 82 lx per µmol m⁻² s⁻¹). Measurements were conducted during three diel states: Day (solar noon), Night (astronomical midnight, natural darkness), and ALAN (HPS lamp switched on at civil dusk). Values marked as < LOD indicate measurements below the detection limit of the sensor; such entries may arise because reported values represent means of 2–3 replicate readings, where only one replicate exceeded the detection threshold. Although the same HPS lamp, mounting height, and platform configuration were used in both campaigns, measured ALAN irradiance at corresponding depths was consistently lower in June than in May. Independent laboratory calibration indicated no difference in lamp emission, suggesting that between-month discrepancies most likely reflect field measurement uncertainty (e.g. slight differences in sensor orientation relative to the light field at very low irradiance levels), rather than true differences in illumination. In both months, near-surface ALAN irradiance was >3,600-fold lower than daytime irradiance, confirming that artificial illumination remained within a realistic nocturnal range. Accordingly, ALAN values are used to define the presence versus absence of nocturnal illumination rather than to interpret fine-scale differences in absolute ALAN intensity between months.

|  |  | **May** | | | | | | | | |  | **June** | | | | | | | | |
| --- | --- | --- | --- | --- | --- | --- | --- | --- | --- | --- | --- | --- | --- | --- | --- | --- | --- | --- | --- | --- |
|  |  | **µmol m⁻² s⁻¹** | | | | | | | **µmol m⁻² s⁻¹** | **lx** |  | **µmol m⁻² s⁻¹** | | | | | | | **µmol m⁻² s⁻¹** | **lx** |
| **Variant** | **Depth** | **05/23** | **05/24** | **05/25** | **05/26** | **05/27** | **05/28** | **05/29** | **Mean value** | |  | **06/26** | **06/27** | **06/28** | **06/29** | **06/30** | **07/01** | **07/02** | **Mean value** | |
| Day | 0 | nd | nd | nd | 107 | 570 | 720 | 790 | **546.75** | 29525 |  | nd | 1690 | 440 | 826 | 299 | 285 | nd | **708.00** | 38232 |
| 0.5 | nd | 424 | 74 | 69.2 | 540 | 527 | 500 | **355.70** | 19208 |  | 86.9 | 550 | 309 | 632 | 129 | 212 | nd | **319.82** | 17270 |
| 1 | nd | nd | nd | 49.2 | 412 | 365 | 320 | **286.55** | 15474 |  | 59.8 | 347 | 228 | 345 | 94 | 114 | nd | **197.97** | 10690 |
| 2 | nd | 164 | 38 | 32 | 243 | 206 | 248 | **155.17** | 8379 |  | 37 | 183 | 94.32 | 177 | 35.8 | 62.5 | nd | **98.27** | 5307 |
| 3 | nd | nd | nd | 18.3 | 128 | 113 | 121 | **95.08** | 5134 |  | 15.92 | 120 | 42 | 85 | 17 | 36.18 | nd | **52.68** | 2845 |
| 4 | nd | 40 | 90 | 9.6 | 66 | 72.3 | 75 | **58.82** | 3176 |  | 6.08 | 49 | 23.25 | 97.2 | 8 | 21 | nd | **34.09** | 1841 |
| 5 | nd | nd | nd | 5.31 | 35 | 35.3 | 40 | **28.90** | 1561 |  | 4.1 | 23.5 | 12.68 | 12.73 | 3.7 | 8.19 | nd | **10.82** | 584 |
| 6 | nd | 7.5 | 18 | 2.3 | 14.7 | 18.2 | 16.6 | **12.88** | 696 |  | 1.05 | 14.5 | 5.82 | 5.95 | 1.8 | 3.03 | nd | **5.36** | 289 |
| 7 | nd | nd | nd | 1.05 | 9.6 | 17.1 | 11.8 | **9.89** | 534 |  | 0.5 | 5.6 | 3.06 | 2.24 | 0.66 | 1.48 | nd | **2.26** | 122 |
| Night |  | below detection limit (< 0.01 µmol m⁻² s⁻¹) | | | | | | | | | | | | | | | | | | |
| ALAN | 0 | nd | nd | nd | 0.0600 | nd | 0.3000 | nd | **0.1800** | 14.76 |  | nd | 0.0520 | nd | 0.0533 | nd | nd | 0.0400 | **0.0484** | 3.97 |
| 0.5 | nd | 0.2200 | nd | 0.0100 | nd | 0.0667 | nd | **0.0989** | 8.11 |  | nd | 0.0047 | nd | nd | nd | nd | 0.0200 | **0.0123** | 1.01 |
| 1 | nd | nd | nd | nd | nd | nd | nd | nd | nd |  | nd | 0.0010 | nd | 0.0333 | nd | nd | 0.0100 | **0.0148** | 1.21 |
| 2 | nd | 0.1750 | nd | 0.0033 | nd | < LOD | nd | **0.0594** | 4.87 |  | nd | 0.0010 | nd | 0.0017 | nd | nd | 0.0033 | **0.0020** | 0.16 |
| 3 | nd | nd | nd | nd | nd | nd | nd | nd | nd |  | nd | < LOD | nd | 0.0010 | nd | nd | < LOD | **0.0003** | 0.02 |
| 4 | nd | 0.0600 | nd | < LOD | nd | < LOD | nd | **0.0200** | 1.64 |  | nd | < LOD | nd | < LOD | nd | nd | < LOD | **0.0000** | < LOD |
| 5 | nd | nd | nd | nd | nd | nd | nd | nd | nd |  | nd | < LOD | nd | < LOD | nd | nd | < LOD | **0.0000** | < LOD |
| 6 | nd | 0.0350 | nd | < LOD | nd | < LOD | nd | **0.0117** | 0.96 |  | nd | < LOD | nd | < LOD | nd | nd | < LOD | **0.0000** | < LOD |
| 7 | nd | nd | nd | nd | nd | nd | nd | nd | nd |  | nd | < LOD | nd | < LOD | nd | nd | < LOD | **0.0000** | < LOD |

## **Table S2. Hydrographic and trophic context of the water column**

Depth-resolved physicochemical characteristics of Lake Roś during the May and June campaigns, measured with an EXO1 (YSI) multiparameter fluorometric sonde at the central sampling station. Reported parameters include temperature (°C), dissolved oxygen concentration (mg O₂ L⁻¹), and particulate carbon concentration (mg C L⁻¹; fluorescence-derived proxy). Seasonal differences were pronounced: in May, the epilimnion was cooler and more strongly stratified, with higher particulate carbon concentrations confined to the upper layers, whereas in June the water column was warmer and more vertically homogeneous, with relatively higher particulate carbon concentrations at depth. These contrasts define the hydrographic and trophic background against which biological responses to light treatments were evaluated.

|  |  | **May** | **June** |
| --- | --- | --- | --- |
| **Parameter** | **Depth** |
| mg C L-1 | 0.5 | 17.26 | 7.97 |
| 2 | 8.68 | 9.98 |
| 4 | 4.23 | 8.92 |
| 6 | 2.7 | 8.94 |
| T °C | 0 | nd | nd |
| 0.5 | 18.4 | 20.1 |
| 1 | nd | 20.3 |
| 2 | 17.3 | 20 |
| 3 | nd | 19.9 |
| 4 | 14.1 | 19.9 |
| 5 | nd | 19.8 |
| 6 | 11.2 | 19.7 |
| 7 | nd | 18.3 |
| mg O2 L-1 | 0 | nd | nd |
| 0.5 | 10.95 | 8.68 |
| 1 | nd | 8.55 |
| 2 | 10.98 | 8.4 |
| 3 | nd | 8.35 |
| 4 | 10.9 | 8.24 |
| 5 | nd | 8.12 |
| 6 | 8.03 | 7.8 |
| 7 | nd | 7.3 |

### **Table S3. Effects of light treatment and month on depth-integrated zooplankton density**

Analysis of deviance (type II Wald χ² tests) from generalized linear models (GLMs) evaluating the effects of light treatment (Treatment: Day, Night, ALAN), month (Month: May, June), and their interaction on depth-integrated zooplankton densities (individuals L⁻¹), averaged over the 0–6 m water column. Reported are χ² statistics with associated degrees of freedom (df) and p-values. Statistically significant effects (p < 0.05) are shown in **bold**.

| **Species** | **Factors; Interaction** | **χ2** | **df** | ***p*** |
| --- | --- | --- | --- | --- |
|  | Treatments | **7.194** | 2 | **0.027** |
| *B. longirostris* | Month | **332.163** | **1** | **<0.001** |
|  | Treatments × Month | 3.787 | 2 | 0.151 |
|  | Treatments | 4.601 | 2 | 0.100 |
| *E. thersites* | Month | 0.743 | 1 | 0.389 |
|  | Treatments × Month | 1.438 | 2 | 0.487 |
|  | Treatments | 0.761 | 2 | 0.683 |
| *D. cucullata* | Month | **131.088** | **1** | **<0.001** |
|  | Treatments × Month | 0.662 | 2 | 0.718 |
|  | Treatments | **6.201** | 2 | **0.045** |
| *D. longispina* | Month | 0.122 | 1 | 0.726 |
|  | Treatments × Month | 7.350 | 2 | 0.025 |
|  | Treatments | 0.433 | 2 | 0.806 |
| *Cyclops* sp. | Month | **84.350** | **1** | **<0.001** |
|  | Treatments × Month | 0.453 | 2 | 0.797 |
|  | Treatments | **13.574** | **2** | **0.001** |
| *Calanoida* sp. | Month | **141.081** | **1** | **<0.001** |
|  | Treatments × Month | 5.323 | 2 | 0.070 |
|  | Treatments | **10.934** | 2 | **0.004** |
| *L. kindtii* | Month | **33.742** | **1** | **<0.001** |
|  | Treatments × Month | 4.173 | 2 | 0.124 |
|  | Treatments | 0.003 | 2 | 0.998 |
| *C. flavicans* | Month | 0.361 | 1 | 0.548 |
|  | Treatments × Month | 0.003 | 2 | 0.998 |

### **Table S4. Effects of light treatment and month on depth-integrated density of gravid females**

Analysis of deviance (type II Wald χ² tests) from generalized linear models (GLMs) evaluating the effects of light treatment (Treatment: Day, Night, ALAN), month (Month: May, June), and their interaction on depth-integrated densities of ovigerous (gravid) females (individuals L⁻¹), averaged over the 0–6 m water column. Reported are χ² statistics with associated degrees of freedom (df) and p-values. Statistically significant effects (p < 0.05) are shown in **bold**.

| **Species** | **Factors; Interaction** | **χ2** | **df** | ***p*** |
| --- | --- | --- | --- | --- |
|  | Treatments | **7.322** | 2 | **0.026** |
| *B. longirostris* | Month | **261.740** | **1** | **0.000** |
|  | Treatments × Month | 1.216 | 2 | 0.544 |
|  | Treatments | 4.288 | 2 | 0.117 |
| *E. thersites* | Month | 7.063 | 1 | 0.008 |
|  | Treatments × Month | 1.813 | 2 | 0.404 |
|  | Treatments | 2.029 | 2 | 0.363 |
| *D. cucullata* | Month | **31.694** | **1** | **0.000** |
|  | Treatments × Month | 0.948 | 2 | 0.622 |
|  | Treatments | **3.321** | 2 | **0.190** |
| *D. longispina* | Month | 0.311 | 1 | 0.577 |
|  | Treatments × Month | 7.184 | 2 | 0.028 |

### **Table S5. Pairwise contrasts of depth-integrated zooplankton density among light treatments**

Planned pairwise contrasts of estimated marginal means (EMMs) for depth-integrated zooplankton densities among light treatments (Day, Night, ALAN), derived from generalized linear models (GLMs) fitted separately for each month (May, June). For each species, contrasts include Day − Night, Day − ALAN, and Night − ALAN. Positive estimates (E) indicate higher density in the first-listed treatment. Reported are the estimate (E), standard error (SE), degrees of freedom (df), test statistic (T), and Holm-adjusted p-value. Statistically significant contrasts (p < 0.05) are shown in **bold**.

| **Species** | **Month** | **contrast** | ***E*** | **SE** | **df** | ***T*** | ***p*** |
| --- | --- | --- | --- | --- | --- | --- | --- |
| *B. longirostris* |  | Day - Night | 0.822 | 0.373 | 18 | -0.434 | 1.000 |
| May | Day - ALAN | 0.668 | 0.303 | 18 | -0.891 | 1.000 |
|  | Night - ALAN | 0.813 | 0.426 | 18 | -0.396 | 1.000 |
|  | Day - Night | **0.264** | **0.120** | **18** | **-2.938** | **0.026** |
| June | Day - ALAN | 0.771 | 0.350 | 18 | -0.572 | 0.574 |
|  | Night - ALAN | 2.924 | 1.531 | 18 | 2.049 | 0.111 |
| *E. thersites* |  | Day - Night | 0.678 | 0.331 | 18 | -0.794 | 0.437 |
| May | Day - ALAN | 1.962 | 0.958 | 18 | 1.380 | 0.369 |
|  | Night - ALAN | 2.892 | 1.631 | 18 | 1.883 | 0.228 |
|  | Day - Night | 0.471 | 0.230 | 18 | -1.540 | 0.423 |
| June | Day - ALAN | 0.859 | 0.419 | 18 | -0.312 | 0.759 |
|  | Night - ALAN | 1.821 | 1.027 | 18 | 1.063 | 0.604 |
| *D. cucullata* |  | Day - Night | 1.001 | 0.483 | 18 | 0.002 | 1.000 |
| May | Day - ALAN | 1.072 | 0.518 | 18 | 0.145 | 1.000 |
|  | Night - ALAN | 1.071 | 0.597 | 18 | 0.124 | 1.000 |
|  | Day - Night | 0.575 | 0.277 | 18 | -1.147 | 0.799 |
| June | Day - ALAN | 0.851 | 0.411 | 18 | -0.333 | 0.980 |
|  | Night - ALAN | 1.481 | 0.826 | 18 | 0.705 | 0.980 |
| *D. longispina* |  | Day - Night | 1.308 | 0.821 | 18 | 0.427 | 1.000 |
| May | Day - ALAN | 1.107 | 0.695 | 18 | 0.162 | 1.000 |
|  | Night - ALAN | 0.846 | 0.614 | 18 | -0.230 | 1.000 |
|  | Day - Night | 0.282 | 0.177 | 18 | -2.017 | 0.118 |
| June | Day - ALAN | **0.107** | **0.067** | **18** | **-3.560** | **0.007** |
|  | Night - ALAN | 0.380 | 0.275 | 18 | -1.336 | 0.198 |
| *Cyclops* sp. |  | Day - Night | 0.864 | 0.183 | 18 | -0.688 | 1.000 |
| May | Day - ALAN | 0.853 | 0.181 | 18 | -0.749 | 1.000 |
|  | Night - ALAN | 0.987 | 0.242 | 18 | -0.053 | 1.000 |
|  | Day - Night | 1.046 | 0.222 | 18 | 0.214 | 1.000 |
| June | Day - ALAN | 0.966 | 0.205 | 18 | -0.164 | 1.000 |
|  | Night - ALAN | 0.923 | 0.226 | 18 | -0.328 | 1.000 |
| *Calanoida* sp. |  | Day - Night | 0.861 | 0.225 | 18 | -0.575 | 1.000 |
| May | Day - ALAN | 0.803 | 0.210 | 18 | -0.840 | 1.000 |
|  | Night - ALAN | 0.933 | 0.281 | 18 | -0.230 | 1.000 |
|  | Day - Night | 0.590 | 0.154 | 18 | -2.019 | 0.117 |
| June | Day - ALAN | **0.343** | **0.090** | **18** | **-4.095** | **0.002** |
|  | Night - ALAN | 0.582 | 0.175 | 18 | -1.798 | 0.117 |
| *L. kindtii* |  | Day - Night | 0.695 | 0.432 | 18 | -0.584 | 0.566 |
| May | Day - ALAN | 0.270 | 0.168 | 18 | -2.107 | 0.148 |
|  | Night - ALAN | 0.388 | 0.279 | 18 | -1.319 | 0.407 |
|  | Day - Night | **0.150** | **0.093** | **18** | **-3.050** | **0.021** |
| June | Day - ALAN | 0.423 | 0.263 | 18 | -1.382 | 0.331 |
|  | Night - ALAN | 2.822 | 2.026 | 18 | 1.445 | 0.331 |
| *C. flavicans* |  | Day - Night | 1.000 | 0.426 | 18 | 0.000 | 1.000 |
| May | Day - ALAN | 1.000 | 0.426 | 18 | 0.000 | 1.000 |
|  | Night - ALAN | 1.000 | 0.492 | 18 | 0.000 | 1.000 |
|  | Day - Night | 1.029 | 0.439 | 18 | 0.067 | 1.000 |
| June | Day - ALAN | 1.029 | 0.439 | 18 | 0.067 | 1.000 |
|  | Night - ALAN | 1.000 | 0.492 | 18 | 0.000 | 1.000 |

### **Table S6. Seasonal contrasts in depth-integrated zooplankton density within treatments**

Planned pairwise contrasts of estimated marginal means (EMMs) comparing depth-integrated zooplankton densities between months (May − June) within each light treatment (Day, Night, ALAN), derived from generalized linear models (GLMs). Positive estimates (E) indicate higher density in May relative to June. Reported are the estimate (E), standard error (SE), degrees of freedom (df), test statistic (T), and Holm-adjusted p-value. Statistically significant contrasts (p < 0.05) are shown in **bold**.

| **Species** | **Treatment** | **contrast** | ***E*** | **SE** | **df** | ***T*** | ***p*** |
| --- | --- | --- | --- | --- | --- | --- | --- |
|  | Day | May - June | **1620.3** | **600.0** | **18** | **19.958** | **<0.001** |
| *B. longirostris* | Night | May - June | **520.4** | **272.5** | **18** | **11.944** | **<0.001** |
|  | ALAN | May - June | **1872.0** | **980.3** | **18** | **14.388** | **<0.001** |
|  | Day | May - June | 1.720 | 0.686 | 18 | 1.360 | 0.191 |
| *E. thersites* | Night | May - June | 1.195 | 0.674 | 18 | 0.316 | 0.755 |
|  | ALAN | May - June | 0.753 | 0.425 | 18 | -0.504 | 0.621 |
|  | Day | May - June | **0.025** | **0.010** | **18** | **-9.406** | **<0.001** |
| *D. cucullata* | Night | May - June | **0.014** | **0.008** | **18** | **-7.646** | **<0.001** |
|  | ALAN | May - June | **0.019** | **0.011** | **18** | **-7.065** | **<0.001** |
|  | Day | May - June | 2.242 | 1.149 | 18 | 1.575 | 0.133 |
| *D. longispina* | Night | May - June | 0.483 | 0.350 | 18 | -1.003 | 0.329 |
|  | ALAN | May - June | **0.217** | **0.157** | **18** | **-2.109** | **0.049** |
|  | Day | May - June | **0.291** | **0.050** | **18** | **-7.127** | **<0.001** |
| *Cyclops* sp. | Night | May - June | **0.352** | **0.086** | **18** | **-4.258** | **<0.001** |
|  | ALAN | May - June | **0.329** | **0.081** | **18** | **-4.533** | **<0.001** |
|  | Day | May - June | **0.196** | **0.042** | **18** | **-7.640** | **<0.001** |
| *Calanoida* sp. | Night | May - June | **0.135** | **0.041** | **18** | **-6.652** | **<0.001** |
|  | ALAN | May - June | **0.084** | **0.025** | **18** | **-8.221** | **<0.001** |
|  | Day | May - June | **0.119** | **0.061** | **18** | **-4.188** | **0.001** |
| *L. kindtii* | Night | May - June | **0.026** | **0.018** | **18** | **-5.097** | **<0.001** |
|  | ALAN | May - June | **0.187** | **0.134** | **18** | **-2.333** | **0.031** |
|  | Day | May - June | 0.850 | 0.296 | 18 | -0.466 | 0.647 |
| *C. flavicans* | Night | May - June | 0.875 | 0.431 | 18 | -0.271 | 0.789 |
|  | ALAN | May - June | 0.875 | 0.431 | 18 | -0.271 | 0.789 |

### **Table S7. Pairwise contrasts of depth-integrated density of gravid females among light treatments**

Planned pairwise contrasts of estimated marginal means (EMMs) for depth-integrated densities of ovigerous (gravid) females among light treatments (Day, Night, ALAN), derived from generalized linear models (GLMs) fitted separately for each month (May, June). For each species, contrasts include Day − Night, Day − ALAN, and Night − ALAN. Positive estimates (E) indicate higher density in the first-listed treatment. Reported are the estimate (E), standard error (SE), degrees of freedom (df), test statistic (T), and Holm-adjusted p-value. Statistically significant contrasts (p < 0.05) are shown in **bold**.

| **Species** | **Month** | **contrast** | ***E*** | **SE** | **df** | ***T*** | ***p*** |
| --- | --- | --- | --- | --- | --- | --- | --- |
| *B. longirostris* |  | Day - Night | 0.620 | 0.275 | 18 | -1.077 | 0.550 |
| May | Day - ALAN | 0.349 | 0.155 | 18 | -2.376 | 0.086 |
|  | Night - ALAN | 0.562 | 0.288 | 18 | -1.126 | 0.550 |
|  | Day - Night | 1.160 | 0.514 | 18 | 0.335 | 0.742 |
| June | Day - ALAN | 0.569 | 0.252 | 18 | -1.273 | 0.542 |
|  | Night - ALAN | 0.490 | 0.251 | 18 | -1.393 | 0.542 |
| *E. thersites* |  | Day - Night | 0.766 | 0.392 | 18 | -0.521 | 0.975 |
| May | Day - ALAN | 1.437 | 0.735 | 18 | 0.709 | 0.975 |
|  | Night - ALAN | 1.876 | 1.107 | 18 | 1.066 | 0.902 |
|  | Day - Night | 0.335 | 0.171 | 18 | -2.140 | 0.139 |
| June | Day - ALAN | 0.669 | 0.342 | 18 | -0.788 | 0.514 |
|  | Night - ALAN | 1.996 | 1.178 | 18 | 1.171 | 0.514 |
| *D. cucullata* |  | Day - Night | 0.669 | 0.550 | 18 | -0.489 | 1.000 |
| May | Day - ALAN | 1.106 | 0.908 | 18 | 0.122 | 1.000 |
|  | Night - ALAN | 1.652 | 1.566 | 18 | 0.529 | 1.000 |
|  | Day - Night | 0.290 | 0.238 | 18 | -1.510 | 0.445 |
| June | Day - ALAN | 0.406 | 0.333 | 18 | -1.098 | 0.573 |
|  | Night - ALAN | 1.402 | 1.329 | 18 | 0.356 | 0.726 |
| *D. longispina* |  | Day - Night | 1.365 | 1.096 | 18 | 0.387 | 1.000 |
| May | Day - ALAN | 1.310 | 1.052 | 18 | 0.336 | 1.000 |
|  | Night - ALAN | 0.960 | 0.891 | 18 | -0.044 | 1.000 |
|  | Day - Night | **0.124** | **0.099** | **18** | **-2.600** | **0.036** |
| June | Day - ALAN | **0.086** | **0.069** | **18** | **-3.048** | **0.021** |
|  | Night - ALAN | 0.698 | 0.647 | 18 | -0.388 | 0.703 |

### **Table S8. Seasonal contrasts in depth-integrated density of gravid females within treatments**

Planned pairwise contrasts of estimated marginal means (EMMs) comparing depth-integrated densities of ovigerous (gravid) females between months (May − June) within each light treatment (Day, Night, ALAN), derived from generalized linear models (GLMs). Positive estimates (E) indicate higher density in May relative to June. Reported are the estimate (E), standard error (SE), degrees of freedom (df), test statistic (T), and Holm-adjusted p-value. Statistically significant contrasts (p < 0.05) are shown in **bold**.

| **Species** | **Treatment** | **contrast** | ***E*** | **SE** | **df** | ***T*** | ***p*** |
| --- | --- | --- | --- | --- | --- | --- | --- |
|  | Day | May - June | **223.0** | **80.7** | **18** | **14.938** | **<0.001** |
| *B. longirostris* | Night | May - June | **416.9** | **213.4** | **18** | **11.785** | **<0.001** |
|  | ALAN | May - June | **363.6** | **186.1** | **18** | **11.518** | **<0.001** |
|  | Day | May - June | 0.663 | 0.277 | 18 | -0.986 | 0.337 |
| *E. thersites* | Night | May - June | **0.290** | **0.171** | **18** | **-2.099** | **0.050** |
|  | ALAN | May - June | 0.308 | 0.182 | 18 | -1.993 | 0.062 |
|  | Day | May - June | **0.070** | **0.047** | **18** | **-3.976** | **0.001** |
| *D. cucullata* | Night | May - June | **0.030** | **0.029** | **18** | **-3.695** | **0.002** |
|  | ALAN | May - June | **0.026** | **0.024** | **18** | **-3.868** | **0.001** |
|  | Day | May - June | 2.619 | 1.718 | 18 | 1.468 | 0.159 |
| *D. longispina* | Night | May - June | 0.238 | 0.220 | 18 | -1.549 | 0.139 |
|  | ALAN | May - June | 0.173 | 0.160 | 18 | -1.893 | 0.075 |

**Table S9.** Analysis of variance (ANOVA) from linear models testing the effects of light treatment (Treatment: Day, Night, ALAN), month (Month: May, June), and their interaction (Treatment × Month) on mean vertical distribution (MVD) for each zooplankton taxon.
SS = sum of squares; df = degrees of freedom; *F* = *F*-statistic; *p* = *p*-value.
Statistically significant effects (*p* < 0.05) are indicated in bold.

| **Species** | **Factors; Interaction** | **SS** | **df** | ***F*** | ***p*** |
| --- | --- | --- | --- | --- | --- |
|  | Treatments | **6.461** | **2** | **8.372** | **0.003** |
| *B. longirostris* | Month | **3.600** | **1** | **9.329** | **0.007** |
|  | Treatments × Month | 1.236 | 2 | 1.602 | 0.229 |
|  | Treatments | **4.160** | **2** | **30.390** | **<0.001** |
| *E. thersites* | Month | **0.458** | **1** | **6.689** | **0.019** |
|  | Treatments × Month | **0.841** | **2** | **6.142** | **0.009** |
|  | Treatments | **4.852** | **2** | **9.093** | **0.002** |
| *D. cucullata* | Month | 0.306 | 1 | 1.147 | 0.298 |
|  | Treatments × Month | **2.018** | **2** | **3.781** | **0.043** |
|  | Treatments | **18.182** | **2** | **13.048** | **<0.001** |
| *D. longispina* | Month | 0.494 | 1 | 0.709 | 0.411 |
|  | Treatments × Month | 1.830 | 2 | 1.313 | 0.293 |
|  | Treatments | **1.515** | **2** | **3.109** | **0.049** |
| *Cyclops* sp. | Month | 0.176 | 1 | 0.721 | 0.407 |
|  | Treatments × Month | 1.273 | 2 | 2.612 | 0.101 |
|  | Treatments | **8.188** | **2** | **6.853** | **0.006** |
| *Calanoida* sp. | Month | 1.051 | 1 | 1.759 | 0.201 |
|  | Treatments × Month | **4.495** | **2** | **3.762** | **0.043** |
|  | Treatments | **15.377** | **2** | **16.043** | **<0.001** |
| *L. kindtii* | Month | **2.606** | **1** | **5.437** | **0.032** |
|  | Treatments × Month | 2.878 | 2 | 3.003 | 0.075 |
|  | Treatments | **3.302** | **2** | **4.433** | **0.027** |
| *C. flavicans* | Month | **5.227** | **1** | **14.035** | **0.001** |
|  | Treatments × Month | 0.455 | 2 | 0.611 | 0.554 |

**Table S10.** Analysis of variance (ANOVA) from linear models testing the effects of light treatment (Treatment: Day, Night, ALAN), month (Month: May, June), and their interaction (Treatment × Month) on mean vertical distribution (MVD) of gravid females in four cladoceran species (*Bosmina longirostris*, *Eubosmina thersites*, *Daphnia cucullata*, *D. longispina*). SS = sum of squares; df = degrees of freedom; *F* = *F*-statistic; *p* = *p*-value.
Statistically significant effects (*p* < 0.05) are indicated in bold.

| **Species** | **Factors; Interaction** | **SS** | **df** | ***F*** | ***p*** |
| --- | --- | --- | --- | --- | --- |
|  | Treatments | **2.394** | **2** | **4.262** | **0.031** |
| *B. longirostris* | Month | 0.407 | 1 | 1.450 | 0.244 |
|  | Treatments × Month | 0.327 | 2 | 0.583 | 0.567 |
|  | Treatments | **24.654** | **2** | **44.846** | **<0.001** |
| *E. thersites* | Month | 0.178 | 1 | 0.647 | 0.432 |
|  | Treatments × Month | 1.604 | 2 | 2.918 | 0.080 |
|  | Treatments | **20.969** | **2** | **16.791** | **<0.001** |
| *D. cucullata* | Month | 1.363 | 1 | 2.183 | 0.157 |
|  | Treatments × Month | 0.181 | 2 | 0.145 | 0.866 |
|  | Treatments | **30.325** | **2** | **34.651** | **<0.001** |
| *D. longispina* | Month | 0.010 | 1 | 0.022 | 0.884 |
|  | Treatments × Month | 0.839 | 2 | 0.959 | 0.402 |

**Table S11.** Analysis of deviance (type II Wald χ² tests) from generalized linear mixed models (GLMMs) evaluating the effects of light treatment (Treatment), depth (Depth), month (Month), and their interactions on individual body size (body length, mm) in five zooplankton taxa (*Bosmina longirostris*, *Eubosmina thersites*, *Daphnia cucullata*, *D. longispina*, *Leptodora kindtii*). Reported are χ² statistics with associated degrees of freedom (df) and *p*-values. Statistically significant effects (*p* < 0.05) are indicated in bold.

*Note:* Body-size data for *B. longirostris* were unavailable in June; analyses for this species include May samples only.

| **Species** | **Factors; Interactions** | **χ2** | **df** | ***p*** |
| --- | --- | --- | --- | --- |
| *B. longirostris* | Treatment | **13.017** | **2** | **0.001** |
| Depth | 7.061 | 3 | 0.070 |
| Treatment × Depth | **21.467** | **6** | **0.002** |
| *E. thersites* | Treatment | **28.723** | **2** | **<0.001** |
| Depth | **38.636** | **3** | **<0.001** |
| Month | **7.364** | **1** | **<0.001** |
| Treatment × Depth | **25.940** | **6** | **<0.001** |
| Treatment × Month | **18.261** | **2** | **<0.001** |
| Depth × Month | **13.575** | **3** | **0.004** |
| Treatment × Depth × Month | 10.272 | 6 | 0.114 |
| *D. cucullata* | Treatment | **13.302** | **2** | **0.001** |
| Depth | **58.634** | **3** | **<0.001** |
| Month | **35.814** | **1** | **<0.001** |
| Treatment × Depth | **33.622** | **6** | **<0.001** |
| Treatment × Month | 2.455 | 2 | 0.293 |
| Depth × Month | **7.303** | **3** | **0.050** |
| Treatment × Depth × Month | 6.976 | 6 | 0.323 |
| *D. longispina* | Treatment | **224.314** | **2** | **<0.001** |
| Depth | **105.787** | **3** | **<0.001** |
| Month | **8.662** | **1** | **<0.001** |
| Treatment × Depth | **44.377** | **6** | **<0.001** |
| Treatment × Month | **8.156** | **2** | **0.017** |
| Depth × Month | **15.733** | **3** | **<0.001** |
| Treatment × Depth × Month | 4.892 | 6 | 0.558 |
| *L. kindtii* | Treatment | **20.384** | **2** | **<0.001** |
| Depth | **37.008** | **3** | **<0.001** |
| Month | 3.367 | 1 | 0.067 |
| Treatment × Depth | 9.566 | 6 | 0.144 |
| Treatment × Month | 1.609 | 2 | 0.447 |
| Depth × Month | **11.209** | **3** | **0.011** |
| Treatment × Depth × Month | **14.554** | **6** | **0.024** |

**Table S12.** Planned pairwise contrasts of estimated marginal means (EMMs) for mean vertical distribution (MVD) among light treatments (Day, Night, ALAN), derived from linear models fitted separately for each month (May, June). For each species, contrasts include Day − Night, Day − ALAN, and Night − ALAN. Positive estimates (*E*) indicate deeper MVD in the first-listed treatment. Reported are the estimate (*E*), standard error (SE), degrees of freedom (df), t-statistic (*T*), and Holm-adjusted *p*-value (*p*). Statistically significant contrasts (*p* < 0.05) are shown in bold.

| **Species** | **Month** | **contrast** | ***E*** | **SE** | **df** | ***T*** | ***p*** |
| --- | --- | --- | --- | --- | --- | --- | --- |
| *B. longirostris* |  | Day - Night | **1.792** | **0.439** | **18** | **4.079** | **0.002** |
| May | Day - ALAN | 0.490 | 0.439 | 18 | 1.115 | 0.279 |
|  | Night - ALAN | **-1.302** | **0.507** | **18** | **-2.566** | **0.039** |
|  | Day - Night | 0.707 | 0.439 | 18 | 1.909 | 0.055 |
| June | Day - ALAN | -0.100 | 0.439 | 18 | -0.229 | 0.822 |
|  | Night - ALAN | -0.807 | 0.507 | 18 | -1.591 | 0.375 |
| *E. thersites* |  | Day - Night | **3.832** | **0.709** | **18** | **7.263** | **<0.001** |
| May | Day - ALAN | **2.554** | **0.473** | **18** | **5.070** | **<0.001** |
|  | Night - ALAN | 0.667 | 0.142 | 18 | -1.899 | 0.074 |
|  | Day - Night | 1.533 | 0.284 | 18 | 2.308 | 0.066 |
| June | Day - ALAN | **1.835** | **0.339** | **18** | **3.281** | **0.012** |
|  | Night - ALAN | 1.197 | 0.256 | 18 | 0.843 | 0.410 |
| *D. cucullata* |  | Day - Night | **1.593** | **0.365** | **18** | **4.361** | **0.001** |
| May | Day - ALAN | **1.313** | **0.365** | **18** | **3.594** | **0.004** |
|  | Night - ALAN | -0.280 | 0.422 | 18 | -0.665 | 0.515 |
|  | Day - Night | 0.458 | 0.365 | 18 | 1.254 | 0.677 |
| June | Day - ALAN | 0.129 | 0.365 | 18 | 0.352 | 0.890 |
|  | Night - ALAN | -0.329 | 0.422 | 18 | -0.781 | 0.890 |
| *D. longispina* |  | Day - Night | **2.751** | **0.590** | **18** | **4.662** | **0.001** |
| May | Day - ALAN | 1.200 | 0.590 | 18 | 2.833 | 0.071 |
|  | Night - ALAN | **-1.552** | **0.682** | **18** | **-2.277** | **0.011** |
|  | Day - Night | 1.512 | 0.590 | 18 | 2.562 | 0.159 |
| June | Day - ALAN | 0.275 | 0.590 | 18 | 0.466 | 0.647 |
|  | Night - ALAN | -1.237 | 0.682 | 18 | -1.815 | 0.172 |
| *Cyclops* sp. |  | Day - Night | **0.842** | **0.349** | **18** | **2.413** | **0.048** |
| May | Day - ALAN | **1.058** | **0.349** | **18** | **3.031** | **0.022** |
|  | Night - ALAN | 0.216 | 0.403 | 18 | 0.535 | 0.599 |
|  | Day - Night | 0.002 | 0.349 | 18 | 0.007 | 1.000 |
| June | Day - ALAN | 0.068 | 0.349 | 18 | 0.194 | 1.000 |
|  | Night - ALAN | 0.065 | 0.403 | 18 | 0.162 | 1.000 |
| *Calanoida* sp. |  | Day - Night | **2.239** | **0.547** | **18** | **4.096** | **0.002** |
| May | Day - ALAN | **1.771** | **0.547** | **18** | **3.241** | **0.009** |
|  | Night - ALAN | -0.468 | 0.631 | 18 | -0.741 | 0.468 |
|  | Day - Night | 0.376 | 0.547 | 18 | 0.688 | 1.000 |
| June | Day - ALAN | 0.196 | 0.547 | 18 | 0.358 | 1.000 |
|  | Night - ALAN | -0.180 | 0.631 | 18 | -0.286 | 1.000 |
| *L. kindtii* |  | Day - Night | 0.685 | 0.490 | 18 | 1.400 | 0.357 |
| May | Day - ALAN | **1.416** | **0.490** | **18** | **2.893** | **0.029** |
|  | Night - ALAN | 0.731 | 0.565 | 18 | 1.293 | 0.357 |
|  | Day - Night | **2.380** | **0.490** | **18** | **4.862** | **<0.001** |
| June | Day - ALAN | **1.911** | **0.490** | **18** | **3.904** | **0.002** |
|  | Night - ALAN | -0.469 | 0.565 | 18 | -0.830 | 0.418 |
| *C. flavicans* |  | Day - Night | **1.141** | **0.432** | **18** | **2.645** | **0.003** |
| May | Day - ALAN | -0.060 | 0.432 | 18 | -0.139 | 0.891 |
|  | Night - ALAN | **-1.201** | **0.498** | **18** | **-2.411** | **<0.001** |
|  | Day - Night | 0.475 | 0.432 | 18 | 1.100 | 0.607 |
| June | Day - ALAN | -0.185 | 0.432 | 18 | -0.428 | 0.674 |
|  | Night - ALAN | -0.659 | 0.498 | 18 | -1.323 | 0.607 |

**Table S13.** Planned pairwise contrasts of estimated marginal means (EMMs) for mean vertical distribution (MVD) within each light treatment (Day, Night, ALAN) between months (May − June), derived from linear models. Positive estimates (*E*) indicate deeper MVD in May relative to June. Reported are the estimate (*E*), standard error (SE), degrees of freedom (df), t-statistic (*T*), and Holm-adjusted *p*-value (*p*). Statistically significant contrasts (*p* < 0.05) are indicated in bold.

| **Species** | **Treatment** | **contrast** | ***E*** | **SE** | **df** | ***T*** | ***p*** |
| --- | --- | --- | --- | --- | --- | --- | --- |
|  | Day | May - June | **1.193** | **0.359** | **18** | **3.328** | **0.004** |
| *B. longirostris* | Night | May - June | 0.108 | 0.507 | 18 | 0.214 | 0.833 |
|  | ALAN | May - June | 0.603 | 0.507 | 18 | 1.189 | 0.250 |
|  | Day | May - June | 1.036 | 0.157 | 18 | 0.236 | 0.816 |
| *E. thersites* | Night | May - June | **0.414** | **0.089** | **18** | **-4.124** | **0.001** |
|  | ALAN | May - June | 0.744 | 0.159 | 18 | -1.382 | 0.184 |
|  | Day | May - June | 0.354 | 0.298 | 18 | 1.186 | 0.251 |
| *D. cucullata* | Night | May - June | **-0.781** | **0.422** | **18** | **-2.352** | **0.041** |
|  | ALAN | May - June | -0.830 | 0.422 | 18 | -1.968 | 0.065 |
|  | Day | May - June | 0.254 | 0.482 | 18 | 0.527 | 0.604 |
| *D. longispina* | Night | May - June | **-0.985** | **0.682** | **18** | **-1.446** | **0.036** |
|  | ALAN | May - June | -0.670 | 0.682 | 18 | -0.984 | 0.338 |
|  | Day | May - June | 0.629 | 0.285 | 18 | 1.206 | 0.141 |
| *Cyclops* sp. | Night | May - June | -0.211 | 0.403 | 18 | -0.524 | 0.607 |
|  | ALAN | May - June | -0.361 | 0.403 | 18 | -0.897 | 0.382 |
|  | Day | May - June | **1.278** | **0.446** | **18** | **2.864** | **0.036** |
| *Calanoida* sp. | Night | May - June | -0.585 | 0.631 | 18 | -0.927 | 0.366 |
|  | ALAN | May - June | -0.297 | 0.631 | 18 | -0.471 | 0.643 |
|  | Day | May - June | **-1.207** | **0.400** | **18** | **-3.019** | **0.047** |
| *L. kindtii* | Night | May - June | 0.488 | 0.565 | 18 | 0.864 | 0.399 |
|  | ALAN | May - June | -0.711 | 0.565 | 18 | -1.258 | 0.224 |
|  | Day | May - June | **1.131** | **0.352** | **18** | **3.210** | **0.005** |
| *C. flavicans* | Night | May - June | 0.465 | 0.498 | 18 | 0.932 | 0.364 |
|  | ALAN | May - June | **1.007** | **0.498** | **18** | **2.020** | **0.048** |

**Table S14.** Planned pairwise contrasts of estimated marginal means (EMMs) for mean vertical distribution (MVD) of gravid females among light treatments (Day, Night, ALAN) within each month (May, June), derived from linear models. Positive estimates (*E*) indicate deeper MVD in the first-listed treatment. Reported are the estimate (E), standard error (SE), degrees of freedom (df), t-statistic (*T*), and Holm-adjusted *p*-value (*p*). Statistically significant contrasts (*p* < 0.05) are indicated in bold.

| **Species** | | **Month** | **contrast** | ***E*** | **SE** | **df** | ***T*** | ***p*** |
| --- | --- | --- | --- | --- | --- | --- | --- | --- |
| *B. longirostris* | |  | Day - Night | **2.326** | **0.792** | **18** | **2.939** | **0.026** |
| May | Day - ALAN | 0.774 | 0.792 | 18 | 0.978 | 0.341 |
|  | Night - ALAN | **-1.553** | **0.914** | **18** | **-2.399** | **0.013** |
|  | Day - Night | 0.190 | 0.792 | 18 | 0.240 | 1.000 |
| June | Day - ALAN | 0.239 | 0.792 | 18 | 0.301 | 1.000 |
|  | Night - ALAN | 0.048 | 0.914 | 18 | 0.053 | 1.000 |
| *E. thersites* |  | Day - Night | **2.814** | **0.371** | **18** | **7.590** | **<0.001** |
| May | Day - ALAN | **1.840** | **0.371** | **18** | **4.963** | **<0.001** |
|  | Night - ALAN | **-0.974** | **0.428** | **18** | **-2.274** | **0.035** |
|  | Day - Night | **1.600** | **0.371** | **18** | **4.315** | **<0.001** |
| June | Day - ALAN | **1.776** | **0.371** | **18** | **4.790** | **<0.001** |
|  | Night - ALAN | 0.176 | 0.428 | 18 | 0.411 | 0.686 |
| *D. cucullata* |  | Day - Night | **2.302** | **0.559** | **18** | **4.119** | **0.002** |
| May | Day - ALAN | 0.908 | 0.559 | 18 | 1.626 | 0.121 |
|  | Night - ALAN | **-1.393** | **0.645** | **18** | **-2.559** | **0.029** |
|  | Day - Night | **2.221** | **0.559** | **18** | **3.975** | **0.003** |
| June | Day - ALAN | 1.276 | 0.559 | 18 | 2.283 | 0.070 |
|  | Night - ALAN | -0.945 | 0.645 | 18 | -1.465 | 0.160 |
| *D. longispina* |  | Day - Night | **3.023** | **0.468** | **18** | **6.462** | **<0.001** |
| May | Day - ALAN | 0.474 | 0.468 | 18 | 1.014 | 0.324 |
|  | Night - ALAN | **-2.548** | **0.540** | **18** | **-4.718** | **<0.001** |
|  | Day - Night | **2.243** | **0.468** | **18** | **4.795** | **<0.001** |
| June | Day - ALAN | -0.239 | 0.468 | 18 | -0.511 | 0.615 |
|  | Night - ALAN | **-2.482** | **0.540** | **18** | **-4.596** | **<0.001** |

**Table S15.** Planned pairwise contrasts of estimated marginal means (EMMs) for mean vertical distribution (MVD) of gravid females within each light treatment (Day, Night, ALAN) between months (May − June), derived from linear models. Positive estimates (E) indicate deeper MVD in May relative to June. Reported are the estimate (*E*), standard error (SE), degrees of freedom (df), t-statistic (*T*), and Holm-adjusted *p*-value (*p*). Statistically significant contrasts (*p* < 0.05) are indicated in bold.

| **Species** | **Treatment** | **contrast** | ***E*** | **SE** | **df** | ***T*** | ***p*** |
| --- | --- | --- | --- | --- | --- | --- | --- |
|  | Day | May - June | 1.147 | 0.646 | 18 | 1.775 | 0.093 |
| *B. longirostris* | Night | May - June | -0.989 | 0.914 | 18 | -1.082 | 0.294 |
|  | ALAN | May - June | 0.612 | 0.914 | 18 | 0.669 | 0.512 |
|  | Day | May - June | 0.492 | 0.303 | 18 | 1.624 | 0.122 |
| *E. thersites* | Night | May - June | -0.722 | 0.428 | 18 | -1.687 | 0.109 |
|  | ALAN | May - June | 0.427 | 0.428 | 18 | 0.998 | 0.331 |
|  | Day | May - June | -0.548 | 0.456 | 18 | -1.202 | 0.245 |
| *D. cucullata* | Night | May - June | -0.629 | 0.645 | 18 | -0.975 | 0.343 |
|  | ALAN | May - June | -0.181 | 0.645 | 18 | -0.281 | 0.782 |
|  | Day | May - June | 0.333 | 0.382 | 18 | 0.873 | 0.394 |
| *D. longispina* | Night | May - June | -0.446 | 0.540 | 18 | -0.826 | 0.419 |
|  | ALAN | May - June | -0.380 | 0.540 | 18 | -0.703 | 0.491 |

**Table S16.** Planned pairwise contrasts of estimated marginal means (EMMs) for body size within each month (May, June) and depth stratum (0–0.5, 0.5–2, 2–4, 4–6 m) among light treatments (Day, Night, ALAN), derived from generalized linear mixed models (Gaussian). Positive estimates (*E*) indicate larger mean body size in the first-listed treatment. Reported are the estimate (*E*), standard error (SE), degrees of freedom (df), t-statistic (*T*), and Holm-adjusted *p*-value (*p*). Statistically significant contrasts (*p* < 0.05) are indicated in bold.

| **Species** | **Month** | **Depth** | **contrast** | ***E*** | **SE** | **df** | ***T*** | ***p*** |
| --- | --- | --- | --- | --- | --- | --- | --- | --- |
| *B. longirostris* | May | 0 - 0.5 | Day-Night | **-0.025** | **0.006** | **34** | **-3.850** | **0.001** |
| Day-ALAN | **-0.018** | **0.006** | **34** | **-2.752** | **0.019** |
| Night-ALAN | 0.007 | 0.007 | 34 | 0.950 | 0.349 |
| 0.5 - 2 | Day-Night | -0.014 | 0.006 | 34 | -2.151 | 0.077 |
| Day-ALAN | **-0.020** | **0.006** | **34** | **-3.179** | **0.009** |
| Night-ALAN | -0.007 | 0.007 | 34 | -0.890 | 0.380 |
| 2 - 4 | Day-Night | 0.000 | 0.006 | 34 | -0.026 | 1.000 |
| Day-ALAN | -0.002 | 0.006 | 34 | -0.253 | 1.000 |
| Night-ALAN | -0.001 | 0.007 | 34 | -0.196 | 1.000 |
| 4 - 6 | Day-Night | 0.012 | 0.006 | 34 | 1.881 | 0.137 |
| Day-ALAN | -0.005 | 0.006 | 34 | -0.766 | 0.449 |
| Night-ALAN | -0.017 | 0.007 | 34 | -2.293 | 0.084 |
| *E. thersites* | May | 0 - 0.5 | Day-Night | -0.019 | 0.024 | 70 | -0.805 | 0.423 |
| Day-ALAN | -0.005 | 0.024 | 70 | -0.198 | 0.844 |
| Night-ALAN | 0.015 | 0.028 | 70 | 0.526 | 0.601 |
| 0.5 - 2 | Day-Night | -0.005 | 0.024 | 70 | -0.196 | 0.846 |
| Day-ALAN | -0.034 | 0.024 | 70 | -1.420 | 0.160 |
| Night-ALAN | -0.030 | 0.028 | 70 | -1.060 | 0.293 |
| 2 - 4 | Day-Night | -0.008 | 0.024 | 70 | -0.341 | 0.734 |
| Day-ALAN | -0.004 | 0.024 | 70 | -0.179 | 0.858 |
| Night-ALAN | 0.004 | 0.028 | 70 | 0.139 | 0.889 |
| 4 - 6 | Day-Night | 0.030 | 0.024 | 70 | 1.261 | 0.211 |
| Day-ALAN | 0.006 | 0.024 | 70 | 0.242 | 0.810 |
| Night-ALAN | -0.025 | 0.028 | 70 | -0.883 | 0.380 |
| June | 0 - 0.5 | Day-Night | **-0.069** | **0.024** | **70** | **-2.868** | **0.005** |
| Day-ALAN | **-0.118** | **0.024** | **70** | **-4.870** | **<0.001** |
| Night-ALAN | -0.048 | 0.028 | 70 | -1.733 | 0.087 |
| 0.5 - 2 | Day-Night | **-0.071** | **0.024** | **70** | **-2.922** | **0.005** |
| Day-ALAN | **-0.121** | **0.024** | **70** | **-5.016** | **0.001** |
| Night-ALAN | -0.051 | 0.028 | 70 | -1.813 | 0.074 |
| 2 - 4 | Day-Night | -0.046 | 0.024 | 70 | -1.887 | 0.063 |
| Day-ALAN | **-0.105** | **0.024** | **70** | **-4.348** | **<0.001** |
| Night-ALAN | **-0.059** | **0.028** | **70** | **-2.132** | **0.037** |
| 4 - 6 | Day-Night | **0.064** | **0.024** | **70** | **2.669** | **0.009** |
| Day-ALAN | 0.015 | 0.024 | 70 | 0.630 | 0.530 |
| Night-ALAN | -0.049 | 0.028 | 70 | -1.765 | 0.082 |
| *D. cucullata* | May | 0 - 0.5 | Day-Night | **-0.202** | **0.048** | **70** | **-4.161** | **<0.001** |
| Day-ALAN | -0.022 | 0.048 | 70 | -0.461 | 0.646 |
| Night-ALAN | **0.179** | **0.056** | **70** | **3.204** | **<0.001** |
| 0.5 - 2 | Day-Night | **-0.136** | **0.048** | **70** | **-2.809** | **0.006** |
| Day-ALAN | -0.054 | 0.048 | 70 | -1.111 | 0.270 |
| Night-ALAN | 0.082 | 0.056 | 70 | 1.470 | 0.146 |
| 2 - 4 | Day-Night | **-0.093** | **0.048** | **70** | **-1.912** | **0.050** |
| Day-ALAN | **-0.131** | **0.048** | **70** | **-2.710** | **0.008** |
| Night-ALAN | -0.039 | 0.056 | 70 | -0.691 | 0.492 |
| 4 - 6 | Day-Night | 0.084 | 0.048 | 70 | 1.739 | 0.086 |
| Day-ALAN | 0.015 | 0.048 | 70 | 0.311 | 0.757 |
| Night-ALAN | -0.069 | 0.056 | 70 | -1.237 | 0.220 |
| June | 0 - 0.5 | Day-Night | **-0.149** | **0.048** | **70** | **-3.075** | **0.003** |
| Day-ALAN | **-0.105** | **0.048** | **70** | **-2.162** | **0.034** |
| Night-ALAN | 0.044 | 0.056 | 70 | 0.791 | 0.432 |
| 0.5 - 2 | Day-Night | -0.088 | 0.048 | 70 | -1.825 | 0.072 |
| Day-ALAN | -0.036 | 0.048 | 70 | -0.747 | 0.457 |
| Night-ALAN | 0.052 | 0.056 | 70 | 0.934 | 0.354 |
| 2 - 4 | Day-Night | 0.004 | 0.048 | 70 | 0.084 | 0.934 |
| Day-ALAN | 0.016 | 0.048 | 70 | 0.322 | 0.748 |
| Night-ALAN | 0.012 | 0.056 | 70 | 0.207 | 0.837 |
| 4 - 6 | Day-Night | 0.087 | 0.048 | 70 | 1.790 | 0.078 |
| Day-ALAN | 0.074 | 0.048 | 70 | 1.533 | 0.130 |
| Night-ALAN | -0.012 | 0.056 | 70 | -0.222 | 0.825 |
| *D. longispina* | May | 0 - 0.5 | Day-Night | **-0.498** | **0.064** | **68** | **-7.826** | **<0.001** |
| Day-ALAN | **-0.231** | **0.064** | **68** | **-3.634** | **<0.001** |
| Night-ALAN | **0.267** | **0.074** | **68** | **3.631** | **<0.001** |
| 0.5 - 2 | Day-Night | **-0.388** | **0.064** | **68** | **-6.096** | **<0.001** |
| Day-ALAN | **-0.225** | **0.064** | **68** | **-3.533** | **<0.001** |
| Night-ALAN | **0.163** | **0.074** | **68** | **2.219** | **0.030** |
| 2 - 4 | Day-Night | **-0.186** | **0.064** | **68** | **-2.924** | **0.005** |
| Day-ALAN | **-0.170** | **0.064** | **68** | **-2.664** | **0.010** |
| Night-ALAN | 0.017 | 0.074 | 68 | 0.225 | 0.822 |
| 4 - 6 | Day-Night | -0.009 | 0.064 | 68 | -0.149 | 0.882 |
| Day-ALAN | -0.055 | 0.064 | 68 | -0.867 | 0.389 |
| Night-ALAN | -0.046 | 0.074 | 68 | -0.622 | 0.536 |
| June | 0 - 0.5 | Day-Night | **-0.539** | **0.064** | **68** | **-8.460** | **<0.001** |
| Day-ALAN | **-0.310** | **0.064** | **68** | **-4.876** | **<0.001** |
| Night-ALAN | **0.228** | **0.074** | **68** | **3.103** | **0.003** |
| 0.5 - 2 | Day-Night | **-0.467** | **0.069** | **68** | **-6.792** | **<0.001** |
| Day-ALAN | **-0.190** | **0.069** | **68** | **-2.763** | **<0.001** |
| Night-ALAN | **0.277** | **0.074** | **68** | **3.768** | **<0.001** |
| 2 - 4 | Day-Night | **-0.327** | **0.064** | **68** | **-5.143** | **<0.001** |
| Day-ALAN | **-0.136** | **0.064** | **68** | **-2.143** | **0.036** |
| Night-ALAN | **0.191** | **0.074** | **68** | **2.598** | **0.011** |
| 4 - 6 | Day-Night | **-0.257** | **0.064** | **68** | **-4.043** | **<0.001** |
| Day-ALAN | **-0.153** | **0.064** | **68** | **-2.402** | **0.019** |
| Night-ALAN | 0.104 | 0.074 | 68 | 1.421 | 0.160 |
| *L. kindtii* | May | 0 - 0.5 | Day-Night | -0.540 | 0.935 | 62 | -0.578 | 0.566 |
| Day-ALAN | 0.811 | 0.935 | 62 | 0.868 | 0.389 |
| Night-ALAN | 1.351 | 0.935 | 62 | 1.445 | 0.153 |
| 0.5 - 2 | Day-Night | -0.213 | 0.809 | 62 | -0.264 | 0.793 |
| Day-ALAN | -1.397 | 0.809 | 62 | -1.726 | 0.089 |
| Night-ALAN | -1.183 | 0.935 | 62 | -1.266 | 0.210 |
| 2 - 4 | Day-Night | **-3.235** | **0.809** | **62** | **-3.997** | **<0.001** |
| Day-ALAN | **-2.531** | **0.809** | **62** | **-3.127** | **<0.001** |
| Night-ALAN | 0.705 | 0.935 | 62 | 0.754 | 0.454 |
| 4 - 6 | Day-Night | -1.287 | 0.874 | 62 | -1.473 | 0.146 |
| Day-ALAN | 1.633 | 0.874 | 62 | 1.868 | 0.066 |
| Night-ALAN | **2.920** | **0.935** | **62** | **3.125** | **<0.001** |
| June | 0 - 0.5 | Day-Night | -0.938 | 0.874 | 62 | -1.074 | 0.287 |
| Day-ALAN | -0.579 | 0.874 | 62 | -0.662 | 0.511 |
| Night-ALAN | 0.360 | 0.935 | 62 | 0.385 | 0.701 |
| 0.5 - 2 | Day-Night | -1.407 | 0.836 | 62 | -1.683 | 0.097 |
| Day-ALAN | -0.686 | 0.836 | 62 | -0.821 | 0.415 |
| Night-ALAN | 0.720 | 0.935 | 62 | 0.771 | 0.444 |
| 2 - 4 | Day-Night | -1.281 | 0.809 | 62 | -1.583 | 0.118 |
| Day-ALAN | -1.160 | 0.809 | 62 | -1.433 | 0.157 |
| Night-ALAN | 0.121 | 0.935 | 62 | 0.130 | 0.897 |
| 4 - 6 | Day-Night | -0.871 | 0.809 | 62 | -1.076 | 0.286 |
| Day-ALAN | -1.563 | 0.809 | 62 | -1.931 | 0.058 |
| Night-ALAN | -0.692 | 0.935 | 62 | -0.741 | 0.462 |

**Table S17.** Planned pairwise contrasts of estimated marginal means (EMMs) for body size within each month (May, June) and light treatment (Day, Night, ALAN) among depth strata (contrasts shown as 0.5–2, 0.5–4, 0.5–6, 2–4, 2–6, and 4–6 m), derived from generalized linear mixed models (Gaussian). Positive estimates (*E*) indicate larger mean body size at the first-listed depth. Reported are the estimate (*E*), standard error (SE), degrees of freedom (df), t-statistic (*T*), and Holm-adjusted *p*-value (*p*). Statistically significant contrasts (*p* < 0.05) are indicated in bold.

| **Species** | **Month** | **Treatment** | **contrast** | ***E*** | **SE** | **df** | ***T*** | ***p*** |
| --- | --- | --- | --- | --- | --- | --- | --- | --- |
| *B. longirostris* | May | Day | 0.5-2 | -0.001 | 0.005 | 34 | -0.096 | 0.986 |
| 0.5-4 | **-0.015** | **0.005** | **34** | **-2.955** | **0.023** |
| 0.5-6 | **-0.019** | **0.005** | **34** | **-3.648** | **0.005** |
| 2-4 | **-0.015** | **0.005** | **34** | **-2.859** | **0.023** |
| 2-6 | **-0.018** | **0.005** | **34** | **-3.552** | **0.006** |
| 4-6 | -0.004 | 0.005 | 34 | -0.693 | 0.986 |
| Night | 0.5-2 | 0.010 | 0.007 | 34 | 1.403 | 0.849 |
| 0.5-4 | 0.009 | 0.007 | 34 | 1.222 | 0.921 |
| 0.5-6 | 0.018 | 0.007 | 34 | 2.383 | 0.137 |
| 2-4 | -0.001 | 0.007 | 34 | -0.181 | 0.921 |
| 2-6 | 0.007 | 0.007 | 34 | 0.981 | 0.921 |
| 4-6 | 0.009 | 0.007 | 34 | 1.162 | 0.921 |
| ALAN | 0.5-2 | -0.003 | 0.007 | 34 | -0.437 | 1.000 |
| 0.5-4 | 0.001 | 0.007 | 34 | 0.075 | 1.000 |
| 0.5-6 | -0.006 | 0.007 | 34 | -0.860 | 1.000 |
| 2-4 | 0.004 | 0.007 | 34 | 0.513 | 1.000 |
| 2-6 | -0.003 | 0.007 | 34 | -0.422 | 1.000 |
| 4-6 | -0.007 | 0.007 | 34 | -0.935 | 1.000 |
| *E. thersites* | May | Day | 0.5-2 | -0.006 | 0.020 | 70 | -0.313 | 0.755 |
| 0.5-4 | **-0.045** | **0.020** | **70** | **-2.305** | **0.024** |
| 0.5-6 | **-0.103** | **0.020** | **70** | **-5.216** | **<0.001** |
| 2-4 | **-0.039** | **0.020** | **70** | **-1.992** | **0.050** |
| 2-6 | **-0.097** | **0.020** | **70** | **-4.903** | **<0.001** |
| 4-6 | **-0.057** | **0.020** | **70** | **-2.911** | **0.005** |
| Night | 0.5-2 | 0.009 | 0.028 | 70 | 0.307 | 0.760 |
| 0.5-4 | -0.034 | 0.028 | 70 | -1.227 | 0.224 |
| 0.5-6 | **-0.053** | **0.028** | **70** | **-1.898** | **0.048** |
| 2-4 | -0.043 | 0.028 | 70 | -1.534 | 0.129 |
| 2-6 | **-0.061** | **0.028** | **70** | **-2.205** | **0.031** |
| 4-6 | -0.019 | 0.028 | 70 | -0.671 | 0.504 |
| ALAN | 0.5-2 | -0.036 | 0.028 | 70 | -1.279 | 0.205 |
| 0.5-4 | -0.045 | 0.028 | 70 | -1.614 | 0.111 |
| 0.5-6 | **-0.092** | **0.028** | **70** | **-3.307** | **0.001** |
| 2-4 | -0.009 | 0.028 | 70 | -0.335 | 0.739 |
| 2-6 | **-0.057** | **0.028** | **70** | **-2.028** | **0.046** |
| 4-6 | -0.047 | 0.028 | 70 | -1.694 | 0.095 |
| June | Day | 0.5-2 | 0.001 | 0.020 | 70 | 0.026 | 0.979 |
| 0.5-4 | -0.028 | 0.020 | 70 | -1.422 | 0.159 |
| 0.5-6 | **-0.087** | **0.020** | **70** | **-4.431** | **<0.001** |
| 2-4 | -0.029 | 0.020 | 70 | -1.448 | 0.152 |
| 2-6 | **-0.088** | **0.020** | **70** | **-4.458** | **<0.001** |
| 4-6 | **-0.059** | **0.020** | **70** | **-3.009** | **<0.001** |
| Night | 0.5-2 | -0.001 | 0.028 | 70 | -0.028 | 0.978 |
| 0.5-4 | -0.004 | 0.028 | 70 | -0.155 | 0.877 |
| 0.5-6 | 0.046 | 0.028 | 70 | 1.662 | 0.101 |
| 2-4 | -0.004 | 0.028 | 70 | -0.128 | 0.899 |
| 2-6 | 0.047 | 0.028 | 70 | 1.690 | 0.096 |
| 4-6 | 0.051 | 0.028 | 70 | 1.817 | 0.073 |
| ALAN | 0.5-2 | -0.003 | 0.028 | 70 | -0.108 | 0.915 |
| 0.5-4 | -0.015 | 0.028 | 70 | -0.554 | 0.581 |
| 0.5-6 | 0.045 | 0.028 | 70 | 1.630 | 0.108 |
| 2-4 | -0.012 | 0.028 | 70 | -0.446 | 0.657 |
| 2-6 | 0.048 | 0.028 | 70 | 1.737 | 0.087 |
| 4-6 | **0.061** | **0.028** | **70** | **2.184** | **0.032** |
| *D. cucullata* | May | Day | 0.5-2 | -0.041 | 0.040 | 70 | -1.043 | 0.300 |
| 0.5-4 | -0.076 | 0.040 | 70 | -1.914 | 0.060 |
| 0.5-6 | **-0.269** | **0.040** | **70** | **-6.802** | **<0.001** |
| 2-4 | -0.034 | 0.040 | 70 | -0.871 | 0.387 |
| 2-6 | **-0.228** | **0.040** | **70** | **-5.759** | **<0.001** |
| 4-6 | **-0.193** | **0.040** | **70** | **-4.888** | **<0.001** |
| Night | 0.5-2 | 0.024 | 0.056 | 70 | 0.433 | 0.666 |
| 0.5-4 | 0.033 | 0.056 | 70 | 0.594 | 0.554 |
| 0.5-6 | 0.017 | 0.056 | 70 | 0.299 | 0.766 |
| 2-4 | 0.009 | 0.056 | 70 | 0.161 | 0.873 |
| 2-6 | -0.007 | 0.056 | 70 | -0.134 | 0.894 |
| 4-6 | -0.016 | 0.056 | 70 | -0.295 | 0.769 |
| ALAN | 0.5-2 | -0.073 | 0.056 | 70 | -1.301 | 0.197 |
| 0.5-4 | **-0.185** | **0.056** | **70** | **-3.302** | **<0.001** |
| 0.5-6 | **-0.232** | **0.056** | **70** | **-4.142** | **<0.001** |
| 2-4 | **-0.112** | **0.056** | **70** | **-2.000** | **0.049** |
| 2-6 | **-0.159** | **0.056** | **70** | **-2.841** | **0.006** |
| 4-6 | -0.047 | 0.056 | 70 | -0.840 | 0.404 |
| June | Day | 0.5-2 | -0.027 | 0.040 | 70 | -0.676 | 0.501 |
| 0.5-4 | **-0.117** | **0.040** | **70** | **-2.958** | **0.004** |
| 0.5-6 | **-0.189** | **0.040** | **70** | **-4.779** | **<0.001** |
| 2-4 | **-0.090** | **0.040** | **70** | **-2.282** | **0.026** |
| 2-6 | **-0.162** | **0.040** | **70** | **-4.102** | **<0.001** |
| 4-6 | -0.072 | 0.040 | 70 | -1.820 | 0.073 |
| Night | 0.5-2 | 0.034 | 0.056 | 70 | 0.604 | 0.548 |
| 0.5-4 | 0.036 | 0.056 | 70 | 0.644 | 0.522 |
| 0.5-6 | 0.047 | 0.056 | 70 | 0.834 | 0.407 |
| 2-4 | 0.002 | 0.056 | 70 | 0.040 | 0.968 |
| 2-6 | 0.013 | 0.056 | 70 | 0.230 | 0.818 |
| 4-6 | 0.011 | 0.056 | 70 | 0.191 | 0.849 |
| ALAN | 0.5-2 | 0.042 | 0.056 | 70 | 0.747 | 0.458 |
| 0.5-4 | 0.003 | 0.056 | 70 | 0.060 | 0.953 |
| 0.5-6 | -0.010 | 0.056 | 70 | -0.179 | 0.859 |
| 2-4 | -0.038 | 0.056 | 70 | -0.687 | 0.494 |
| 2-6 | -0.052 | 0.056 | 70 | -0.926 | 0.358 |
| 4-6 | -0.013 | 0.056 | 70 | -0.238 | 0.812 |
| *D. longispina* | May | Day | 0.5-2 | **-0.124** | **0.052** | **68** | **-2.386** | **0.020** |
| 0.5-4 | **-0.247** | **0.052** | **68** | **-4.747** | **<0.001** |
| 0.5-6 | **-0.512** | **0.052** | **68** | **-9.845** | **<0.001** |
| 2-4 | **-0.123** | **0.052** | **68** | **-2.362** | **0.021** |
| 2-6 | **-0.388** | **0.052** | **68** | **-7.459** | **<0.001** |
| 4-6 | **-0.265** | **0.052** | **68** | **-5.097** | **<0.001** |
| Night | 0.5-2 | -0.014 | 0.074 | 68 | -0.189 | 0.851 |
| 0.5-4 | 0.065 | 0.074 | 68 | 0.888 | 0.378 |
| 0.5-6 | -0.023 | 0.074 | 68 | -0.313 | 0.755 |
| 2-4 | 0.079 | 0.074 | 68 | 1.077 | 0.285 |
| 2-6 | -0.009 | 0.074 | 68 | -0.124 | 0.901 |
| 4-6 | -0.088 | 0.074 | 68 | -1.201 | 0.234 |
| ALAN | 0.5-2 | -0.118 | 0.074 | 68 | -1.600 | 0.114 |
| 0.5-4 | **-0.185** | **0.074** | **68** | **-2.517** | **0.014** |
| 0.5-6 | **-0.336** | **0.074** | **68** | **-4.566** | **<0.001** |
| 2-4 | -0.067 | 0.074 | 68 | -0.917 | 0.362 |
| 2-6 | **-0.218** | **0.074** | **68** | **-2.965** | **0.004** |
| 4-6 | **-0.151** | **0.074** | **68** | **-2.048** | **0.044** |
| June | Day | 0.5-2 | **-0.118** | **0.058** | **68** | **-2.037** | **0.045** |
| 0.5-4 | **-0.251** | **0.052** | **68** | **-4.824** | **<0.001** |
| 0.5-6 | **-0.280** | **0.052** | **68** | **-5.385** | **<0.001** |
| 2-4 | **-0.132** | **0.058** | **68** | **-2.277** | **0.026** |
| 2-6 | **-0.161** | **0.058** | **68** | **-2.779** | **0.007** |
| 4-6 | -0.029 | 0.052 | 68 | -0.561 | 0.576 |
| Night | 0.5-2 | -0.047 | 0.074 | 68 | -0.638 | 0.526 |
| 0.5-4 | -0.040 | 0.074 | 68 | -0.538 | 0.592 |
| 0.5-6 | 0.001 | 0.074 | 68 | 0.017 | 0.986 |
| 2-4 | 0.007 | 0.074 | 68 | 0.100 | 0.921 |
| 2-6 | 0.048 | 0.074 | 68 | 0.655 | 0.515 |
| 4-6 | 0.041 | 0.074 | 68 | 0.555 | 0.581 |
| ALAN | 0.5-2 | 0.002 | 0.074 | 68 | 0.027 | 0.978 |
| 0.5-4 | -0.077 | 0.074 | 68 | -1.043 | 0.300 |
| 0.5-6 | **-0.122** | **0.074** | **68** | **-1.665** | **0.047** |
| 2-4 | -0.079 | 0.074 | 68 | -1.071 | 0.288 |
| 2-6 | **-0.124** | **0.074** | **68** | **-1.692** | **0.045** |
| 4-6 | -0.046 | 0.074 | 68 | -0.622 | 0.536 |
| *L. kindtii* | May | Day | 0.5-2 | **1.608** | **0.809** | **62** | **1.987** | **0.050** |
| 0.5-4 | -0.065 | 0.809 | 62 | -0.081 | 0.936 |
| 0.5-6 | -1.151 | 0.874 | 62 | -1.317 | 0.193 |
| 2-4 | **-1.673** | **0.661** | **62** | **-2.532** | **0.014** |
| 2-6 | **-2.759** | **0.739** | **62** | **-3.735** | **<0.001** |
| 4-6 | -1.086 | 0.739 | 62 | -1.470 | 0.147 |
| Night | 0.5-2 | **1.935** | **0.935** | **62** | **2.070** | **0.043** |
| 0.5-4 | **-2.761** | **0.935** | **62** | **-2.954** | **0.004** |
| 0.5-6 | **-1.898** | **0.935** | **62** | **-2.031** | **0.046** |
| 2-4 | **-4.695** | **0.935** | **62** | **-5.024** | **<0.001** |
| 2-6 | **-3.833** | **0.935** | **62** | **-4.102** | **<0.001** |
| 4-6 | 0.862 | 0.935 | 62 | 0.922 | 0.360 |
| ALAN | 0.5-2 | -0.599 | 0.935 | 62 | -0.641 | 0.524 |
| 0.5-4 | **-3.407** | **0.935** | **62** | **-3.645** | **0.001** |
| 0.5-6 | -0.329 | 0.935 | 62 | -0.352 | 0.726 |
| 2-4 | **-2.807** | **0.935** | **62** | **-3.004** | **0.004** |
| 2-6 | 0.271 | 0.935 | 62 | 0.290 | 0.773 |
| 4-6 | **3.078** | **0.935** | **62** | **3.294** | **0.002** |
| June | Day | 0.5-2 | 0.482 | 0.768 | 62 | 0.627 | 0.533 |
| 0.5-4 | 0.040 | 0.739 | 62 | 0.055 | 0.957 |
| 0.5-6 | -0.794 | 0.739 | 62 | -1.074 | 0.287 |
| 2-4 | -0.441 | 0.693 | 62 | -0.637 | 0.527 |
| 2-6 | -1.275 | 0.693 | 62 | -1.840 | 0.071 |
| 4-6 | -0.834 | 0.661 | 62 | -1.262 | 0.212 |
| Night | 0.5-2 | 0.014 | 0.935 | 62 | 0.015 | 0.988 |
| 0.5-4 | -0.302 | 0.935 | 62 | -0.324 | 0.747 |
| 0.5-6 | -0.726 | 0.935 | 62 | -0.777 | 0.440 |
| 2-4 | -0.316 | 0.935 | 62 | -0.338 | 0.736 |
| 2-6 | -0.740 | 0.935 | 62 | -0.791 | 0.432 |
| 4-6 | -0.424 | 0.935 | 62 | -0.453 | 0.652 |
| ALAN | 0.5-2 | 0.374 | 0.935 | 62 | 0.400 | 0.691 |
| 0.5-4 | -0.541 | 0.935 | 62 | -0.579 | 0.565 |
| 0.5-6 | **-1.778** | **0.935** | **62** | **-1.903** | **0.048** |
| 2-4 | -0.915 | 0.935 | 62 | -0.979 | 0.331 |
| 2-6 | **-2.152** | **0.935** | **62** | **-2.302** | **0.025** |
| 4-6 | -1.237 | 0.935 | 62 | -1.324 | 0.190 |

**Table S18.** Planned pairwise contrasts of estimated marginal means (EMMs) for body size within each light treatment (Day, Night, ALAN) and depth stratum (0–0.5, 0.5–2, 2–4, 4–6 m) between months (May − June), derived from generalized linear mixed models (Gaussian). Positive estimates (*E*) indicate larger mean body size in May relative to June. Reported are the estimate (*E*), standard error (SE), degrees of freedom (df), t-statistic (*T*), and Holm-adjusted *p*-value (*p*). Statistically significant contrasts (*p* < 0.05) are indicated in bold.

| **Species** | **Treatment** | **Depth** | **contrast** | ***E*** | **SE** | **df** | ***T*** | ***p*** |
| --- | --- | --- | --- | --- | --- | --- | --- | --- |
| *E. thersites* | Day | 0 - 0.5 | May - June | -0.003 | 0.020 | 70 | -0.162 | 0.872 |
| 0.5 - 2 | May - June | 0.004 | 0.020 | 70 | 0.178 | 0.860 |
| 2 - 4 | May - June | 0.014 | 0.020 | 70 | 0.721 | 0.473 |
| 4 - 6 | May - June | 0.012 | 0.020 | 70 | 0.623 | 0.535 |
| Night | 0 - 0.5 | May - June | -0.053 | 0.028 | 70 | -1.901 | 0.061 |
| 0.5 - 2 | May - June | **-0.062** | **0.028** | **70** | **-2.236** | **0.029** |
| 2 - 4 | May - June | -0.023 | 0.028 | 70 | -0.829 | 0.410 |
| 4 - 6 | May - June | 0.046 | 0.028 | 70 | 1.659 | 0.102 |
| ALAN | 0 - 0.5 | May - June | **-0.116** | **0.028** | **70** | **-4.160** | **<0.001** |
| 0.5 - 2 | May - June | **-0.083** | **0.028** | **70** | **-2.989** | **<0.001** |
| 2 - 4 | May - June | **-0.086** | **0.028** | **70** | **-3.100** | **<0.001** |
| 4 - 6 | May - June | 0.022 | 0.028 | 70 | 0.777 | 0.440 |
| *D. cucullata* | Day | 0 - 0.5 | May - June | 0.049 | 0.040 | 70 | 1.241 | 0.219 |
| 0.5 - 2 | May - June | 0.064 | 0.040 | 70 | 1.608 | 0.112 |
| 2 - 4 | May - June | 0.008 | 0.040 | 70 | 0.197 | 0.845 |
| 4 - 6 | May - June | **0.129** | **0.040** | **70** | **3.264** | **0.002** |
| Night | 0 - 0.5 | May - June | 0.102 | 0.056 | 70 | 1.818 | 0.073 |
| 0.5 - 2 | May - June | **0.111** | **0.056** | **70** | **1.989** | **0.051** |
| 2 - 4 | May - June | 0.104 | 0.056 | 70 | 1.867 | 0.066 |
| 4 - 6 | May - June | **0.132** | **0.056** | **70** | **2.353** | **0.021** |
| ALAN | 0 - 0.5 | May - June | -0.033 | 0.056 | 70 | -0.596 | 0.553 |
| 0.5 - 2 | May - June | 0.081 | 0.056 | 70 | 1.452 | 0.151 |
| 2 - 4 | May - June | **0.155** | **0.056** | **70** | **2.765** | **0.007** |
| 4 - 6 | May - June | **0.188** | **0.056** | **70** | **3.367** | **0.001** |
| *D. longispina* | Day | 0 - 0.5 | May - June | -0.075 | 0.052 | 68 | -1.442 | 0.154 |
| 0.5 - 2 | May - June | -0.069 | 0.058 | 68 | -1.193 | 0.237 |
| 2 - 4 | May - June | -0.079 | 0.052 | 68 | -1.518 | 0.134 |
| 4 - 6 | May - June | **0.157** | **0.052** | **68** | **3.018** | **0.004** |
| Night | 0 - 0.5 | May - June | -0.115 | 0.074 | 68 | -1.568 | 0.121 |
| 0.5 - 2 | May - June | **-0.148** | **0.074** | **68** | **-2.017** | **0.048** |
| 2 - 4 | May - June | **-0.220** | **0.074** | **68** | **-2.994** | **0.004** |
| 4 - 6 | May - June | -0.091 | 0.074 | 68 | -1.238 | 0.220 |
| ALAN | 0 - 0.5 | May - June | **-0.154** | **0.074** | **68** | **-2.096** | **0.040** |
| 0.5 - 2 | May - June | -0.034 | 0.074 | 68 | -0.468 | 0.641 |
| 2 - 4 | May - June | -0.046 | 0.074 | 68 | -0.622 | 0.536 |
| 4 - 6 | May - June | 0.059 | 0.074 | 68 | 0.805 | 0.424 |
| *L. kindtii* | Day | 0 - 0.5 | May - June | 0.746 | 0.874 | 62 | 0.853 | 0.397 |
| 0.5 - 2 | May - June | -0.381 | 0.693 | 62 | -0.549 | 0.585 |
| 2 - 4 | May - June | 0.851 | 0.661 | 62 | 1.289 | 0.202 |
| 4 - 6 | May - June | 1.103 | 0.739 | 62 | 1.493 | 0.140 |
| Night | 0 - 0.5 | May - June | 0.347 | 0.935 | 62 | 0.372 | 0.711 |
| 0.5 - 2 | May - June | -1.574 | 0.935 | 62 | -1.684 | 0.097 |
| 2 - 4 | May - June | **2.805** | **0.935** | **62** | **3.002** | **0.004** |
| 4 - 6 | May - June | 1.520 | 0.935 | 62 | 1.626 | 0.109 |
| ALAN | 0 - 0.5 | May - June | -0.644 | 0.935 | 62 | -0.689 | 0.494 |
| 0.5 - 2 | May - June | 0.330 | 0.935 | 62 | 0.353 | 0.725 |
| 2 - 4 | May - June | **2.222** | **0.935** | **62** | **2.378** | **0.021** |
| 4 - 6 | May - June | **-2.093** | **0.935** | **62** | **-2.239** | **0.029** |
